# Supplementary material for: A comprehensive comparison of random forests and support vector machines for microarray-based cancer classification
Source: PubMed Central journal article supplement (PMC2492881; doi:10.1186/1471-2105-9-319), 2008-07-22

# Additional File 1:

## Results for all gene selection methods, classifiers and datasets.

### Dx-Su

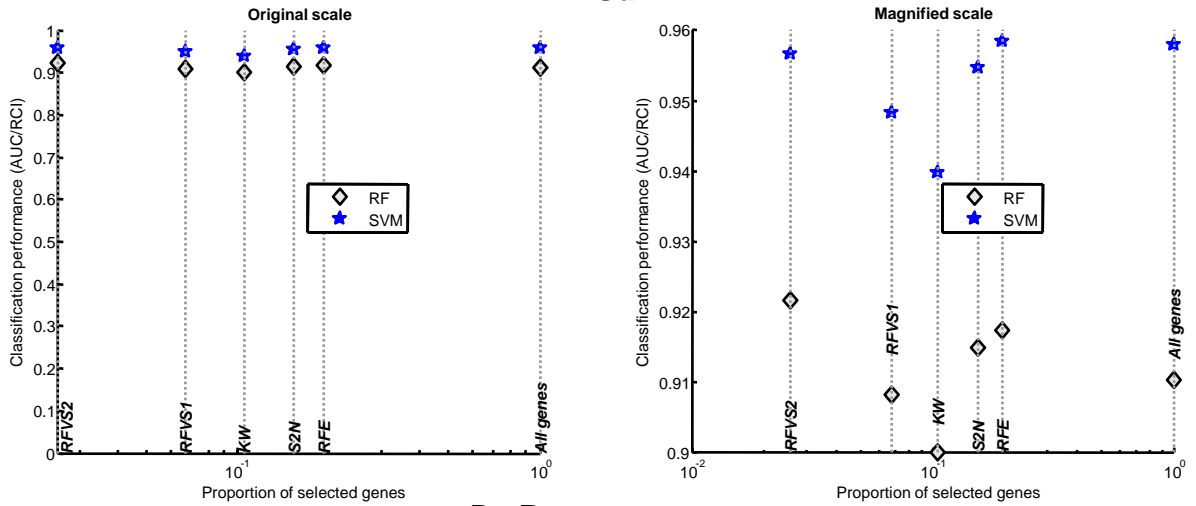

### Dx-Ramaswamy

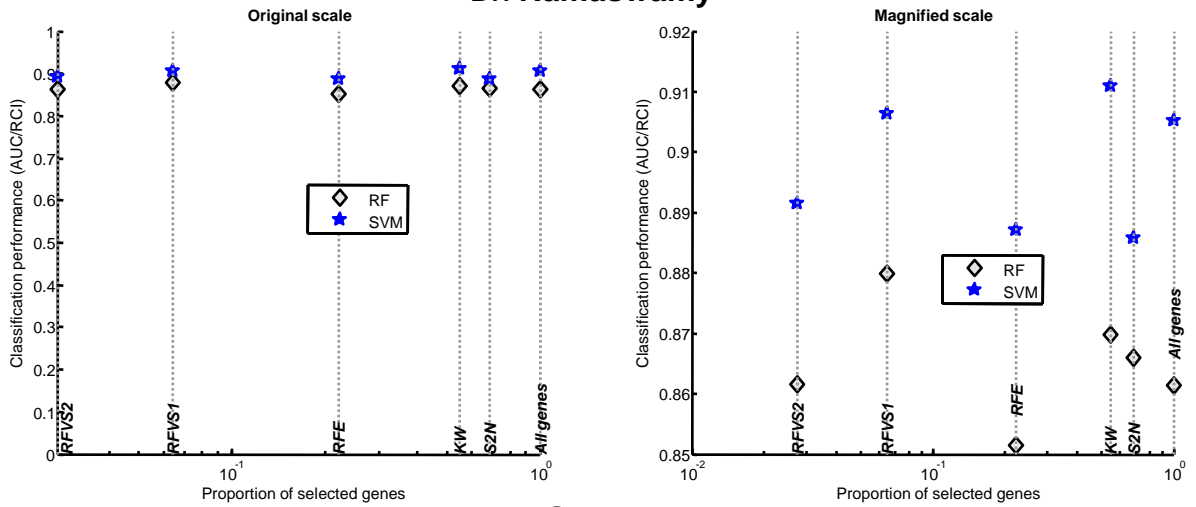

### Dx-Staunton

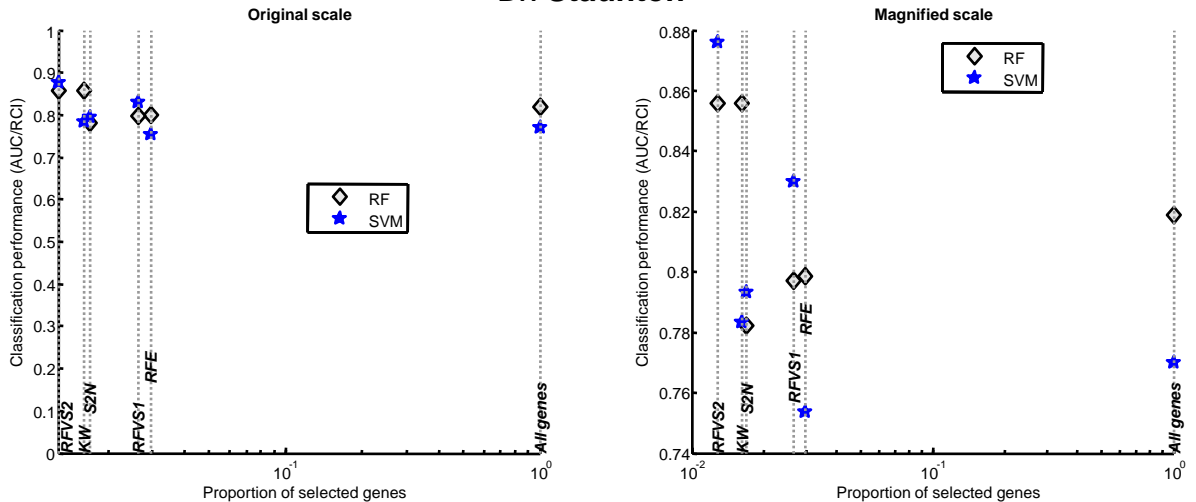

## Dx-Pomeroy

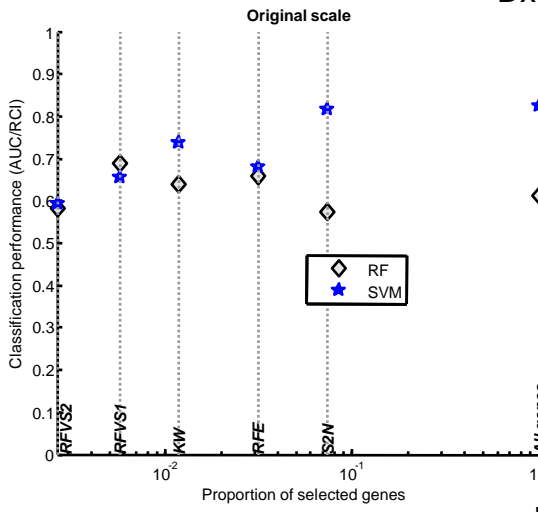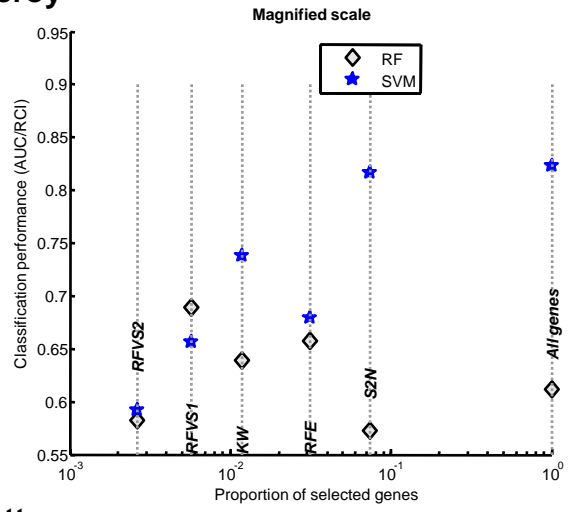

## Dx-Nutt

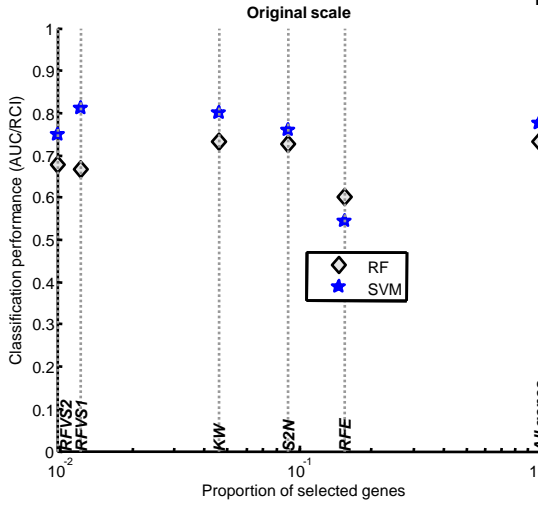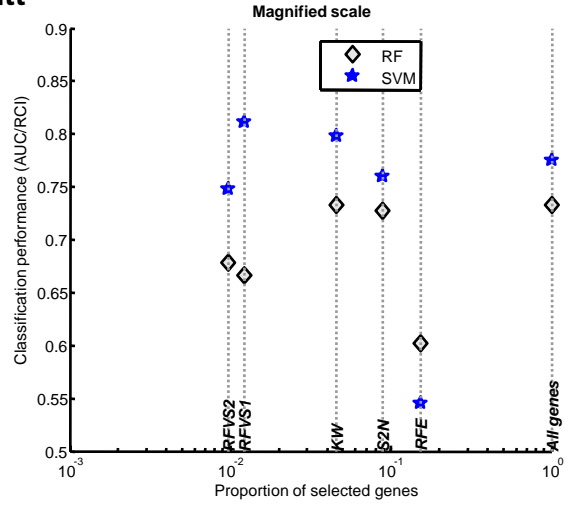

## Dx-Golub

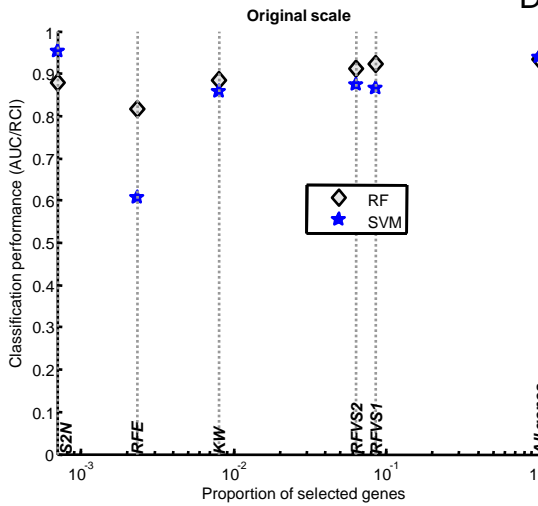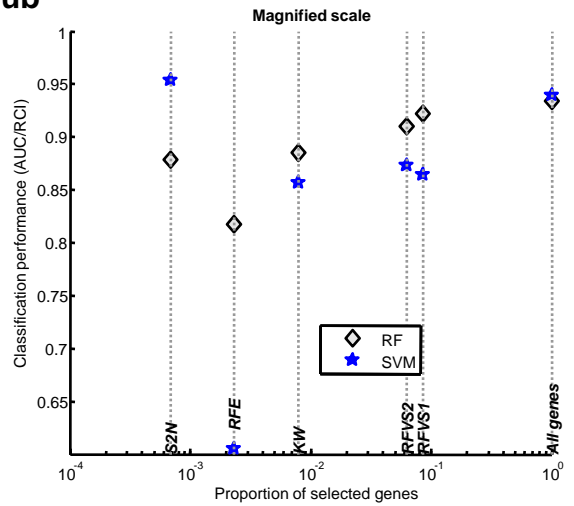

### Dx-Armstrong

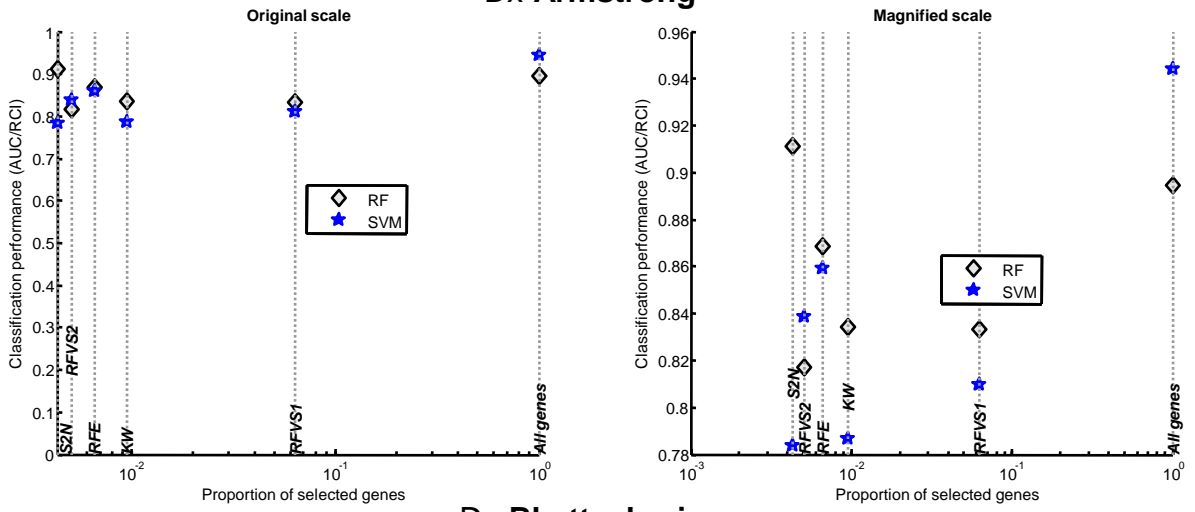

### Dx-Bhattacharjee

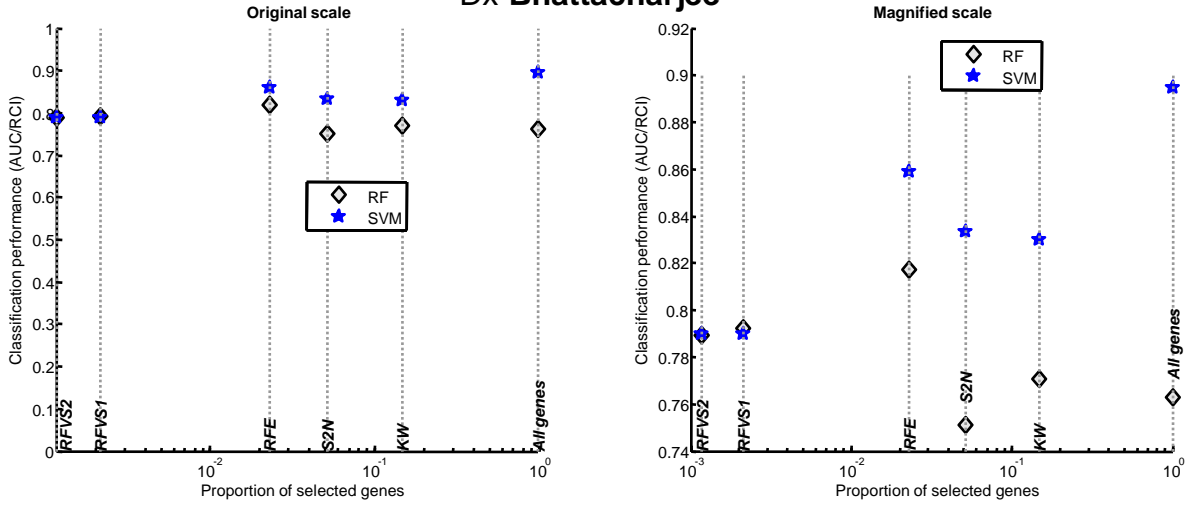

### Dx-Khan

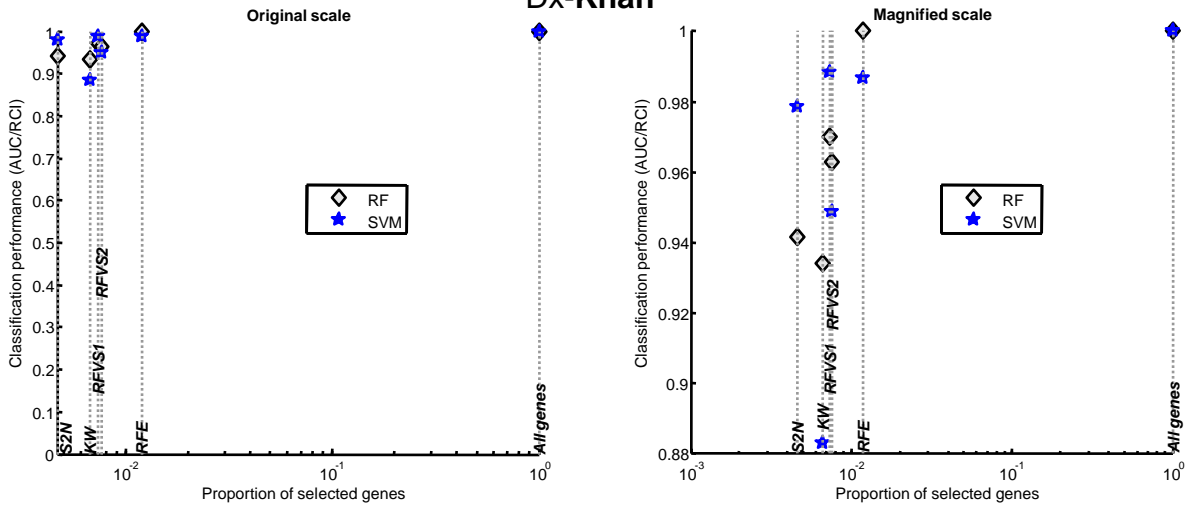

## Dx-Shipp

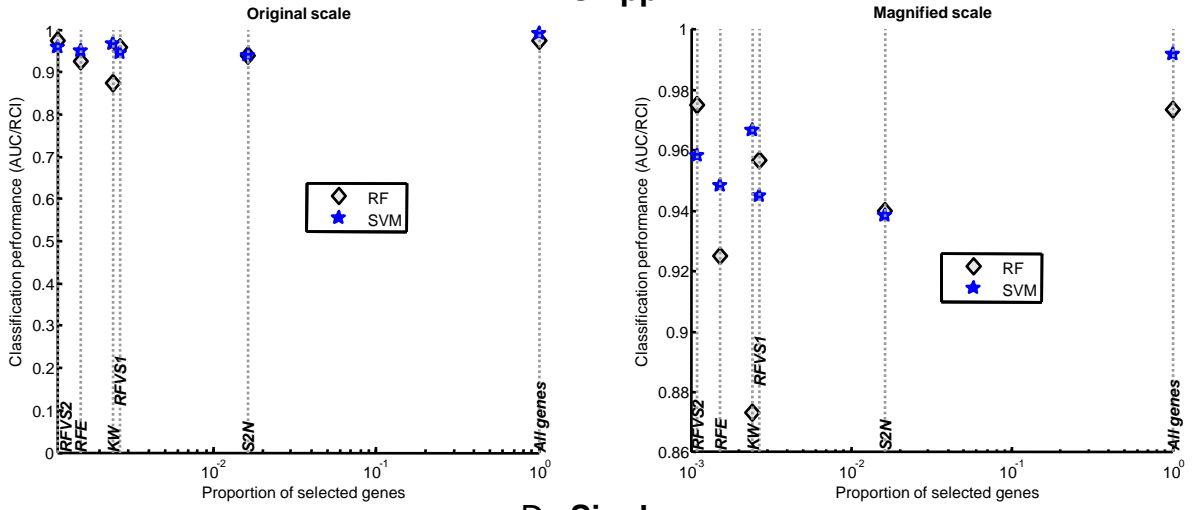

## Dx-Singh

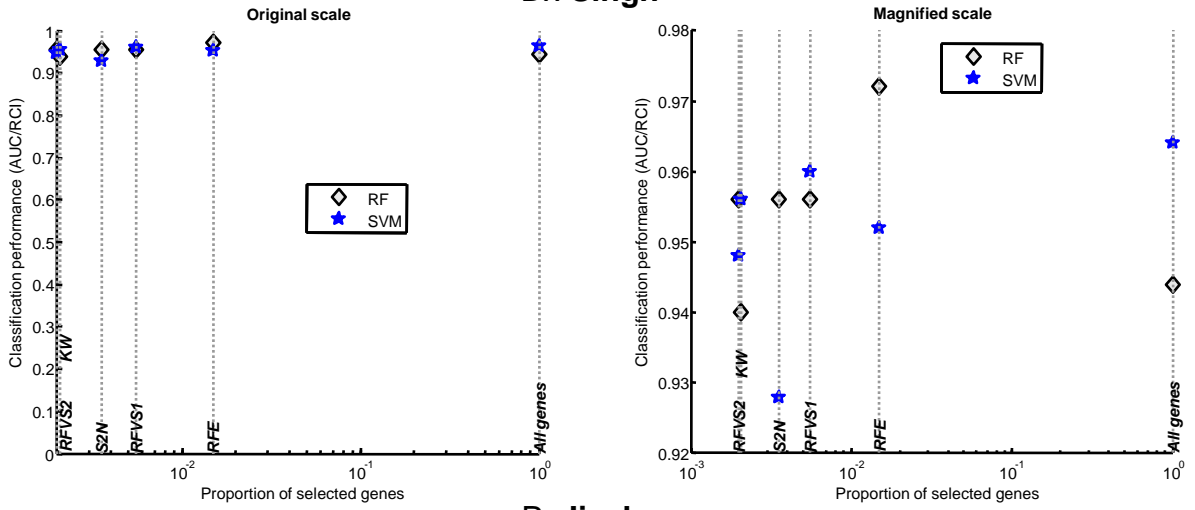

## Px-lizuka

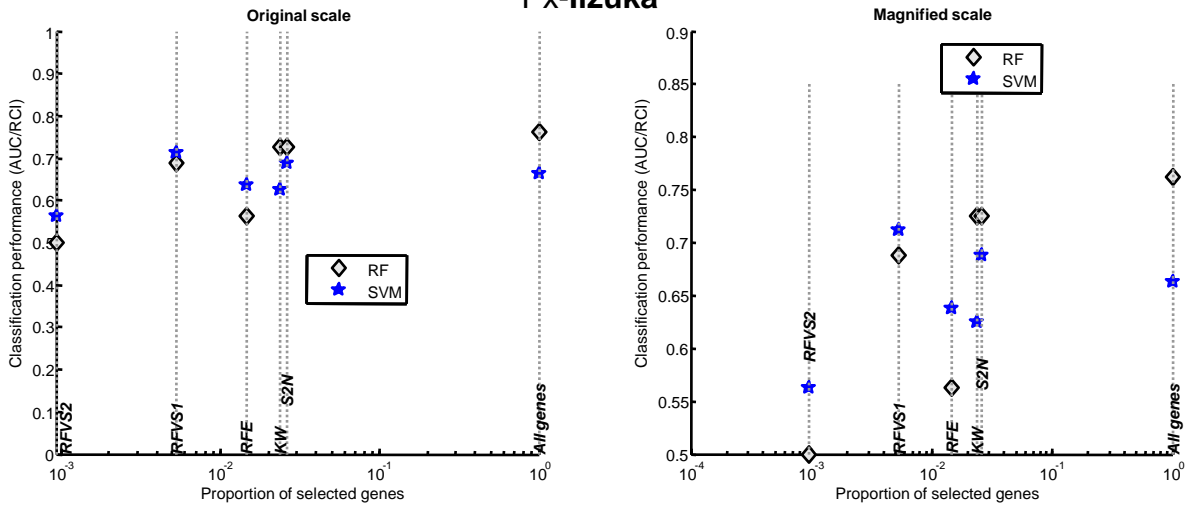

## Px-Beer

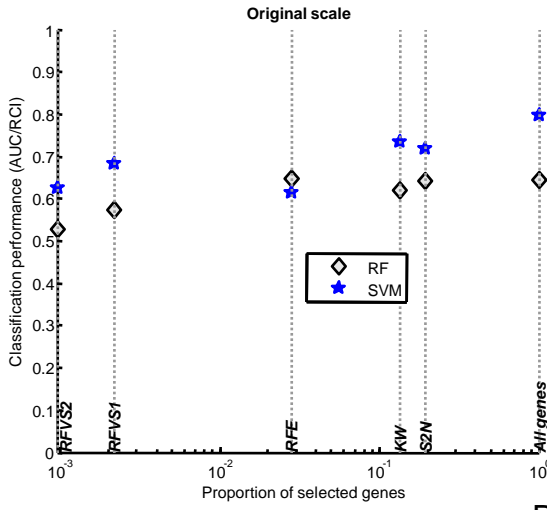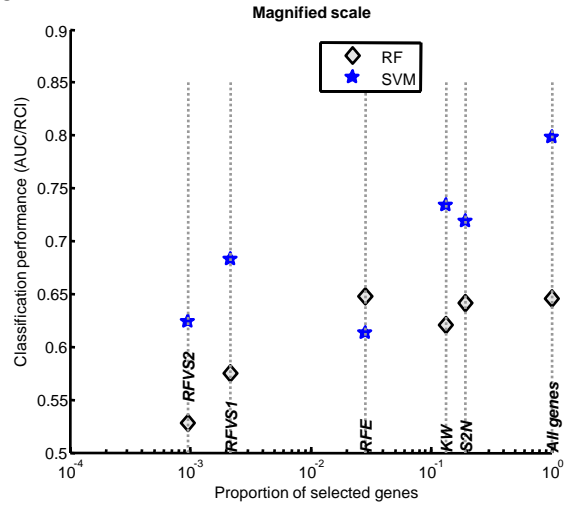

## Px-Veer

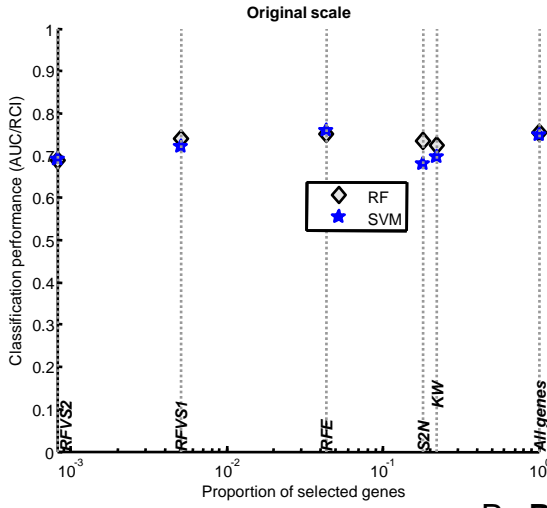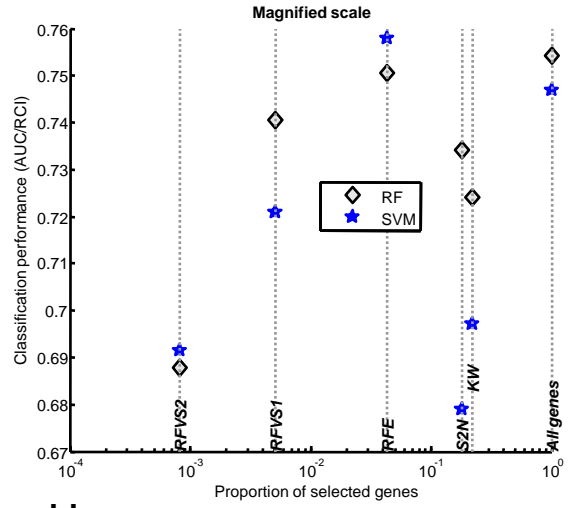

## Px-Rosenwald

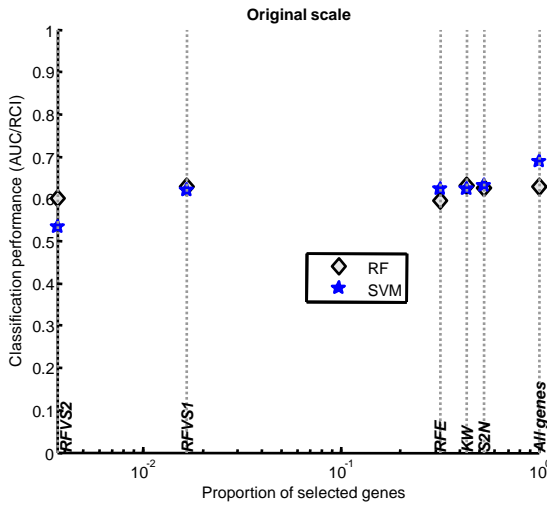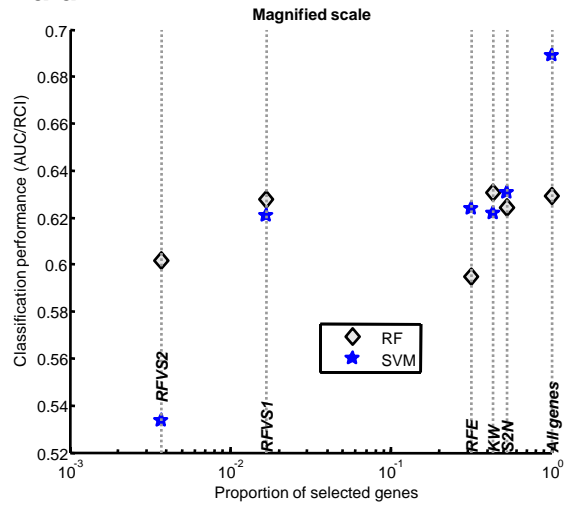

## Px-Yeoh

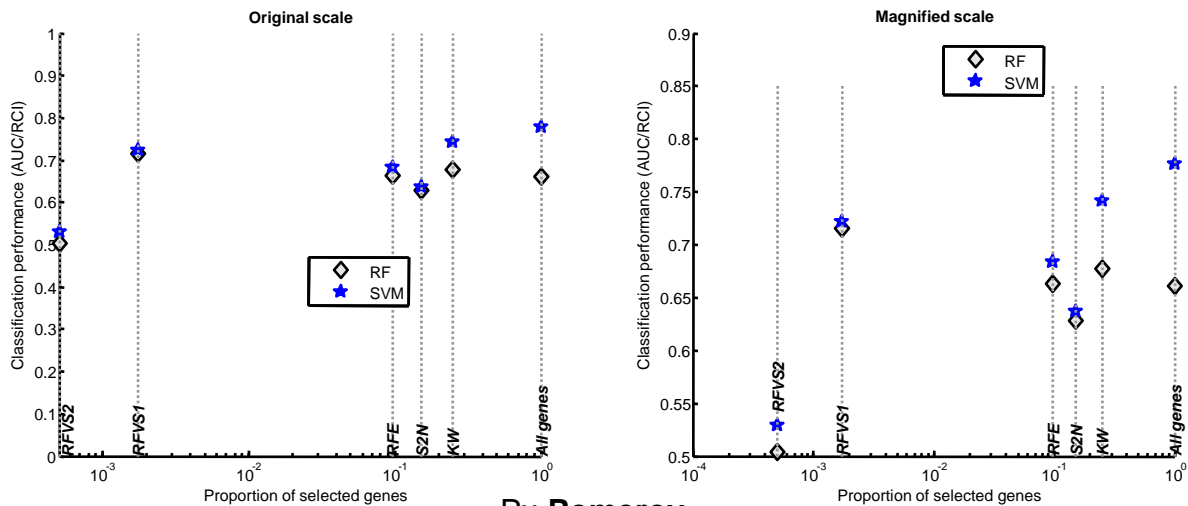

## Px-Pomeroiy

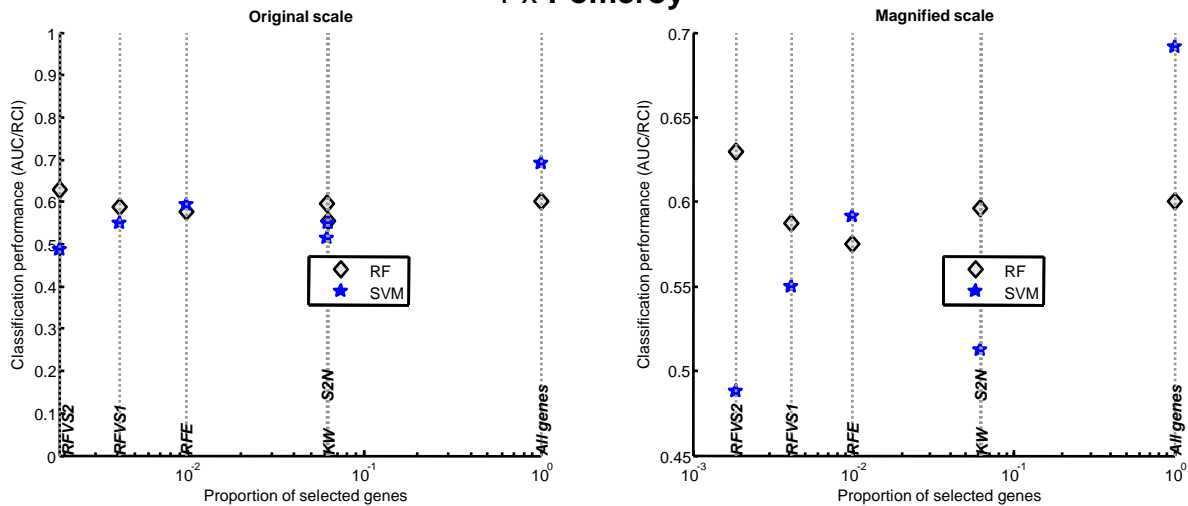

## Px-Bhattacharjee

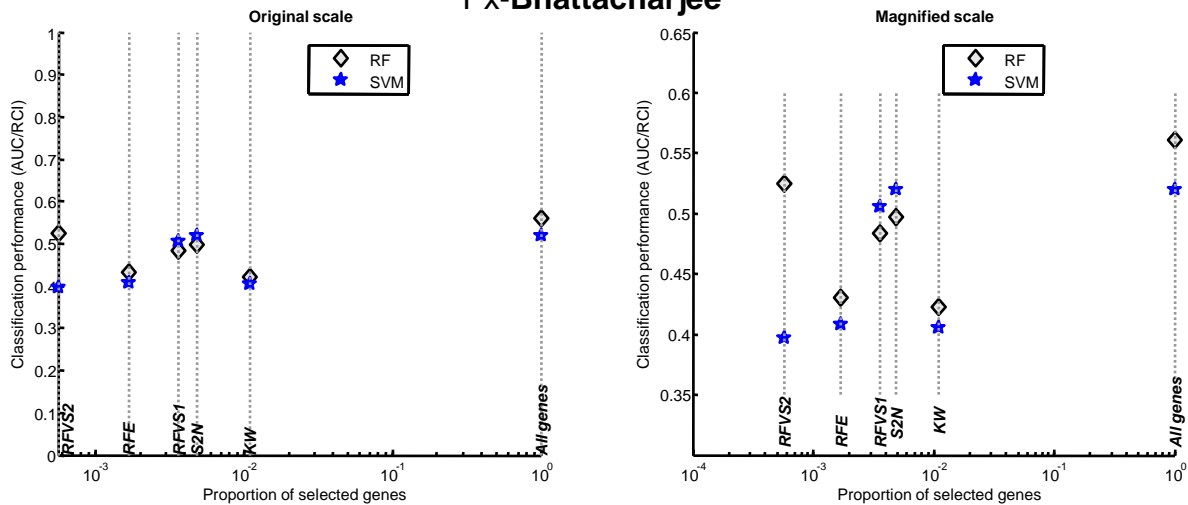

## Px-Veer2

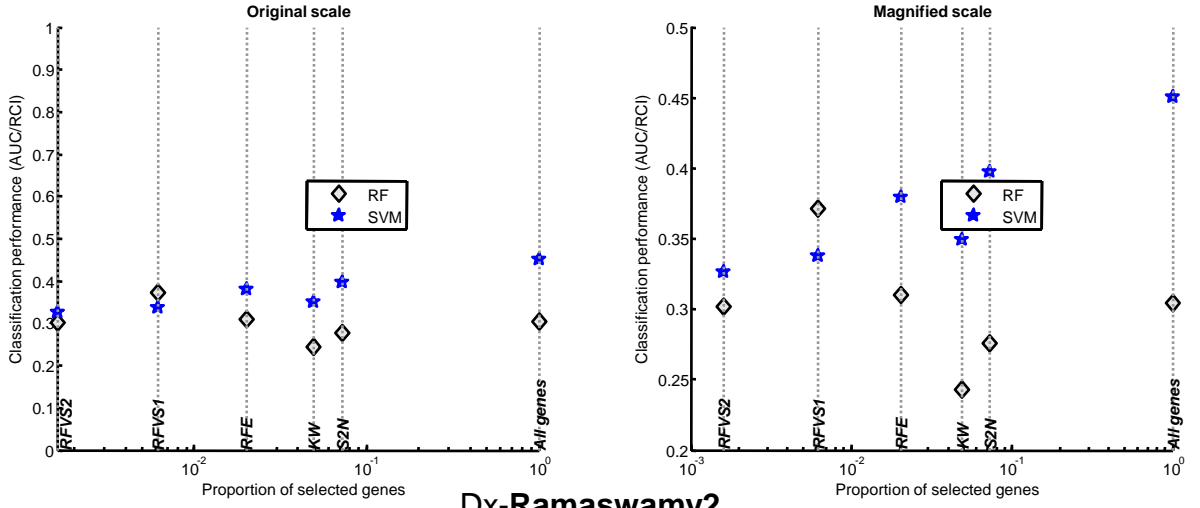

## Dx-Ramaswamy2

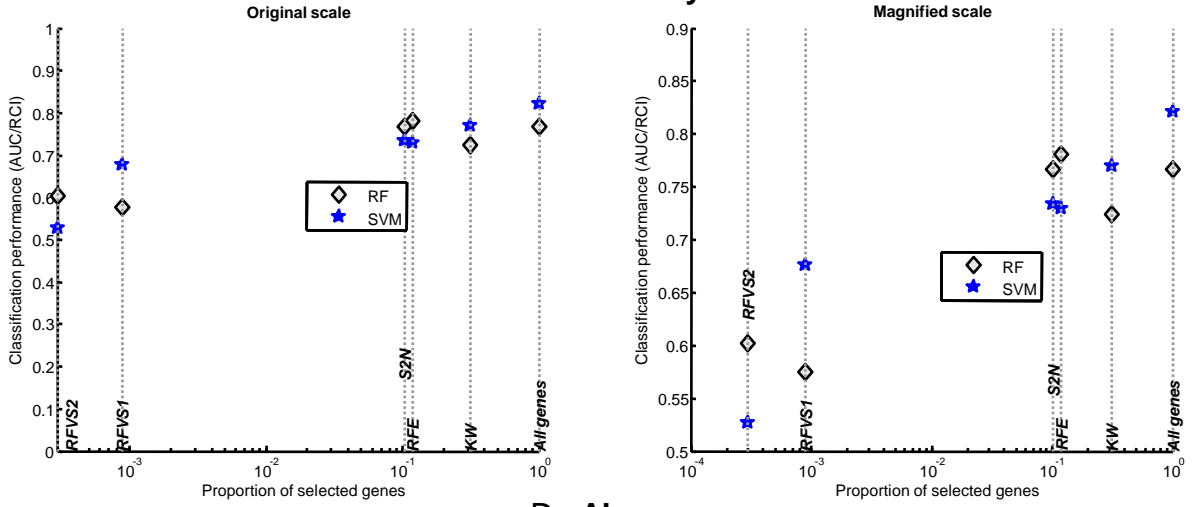

## Dx-Alon

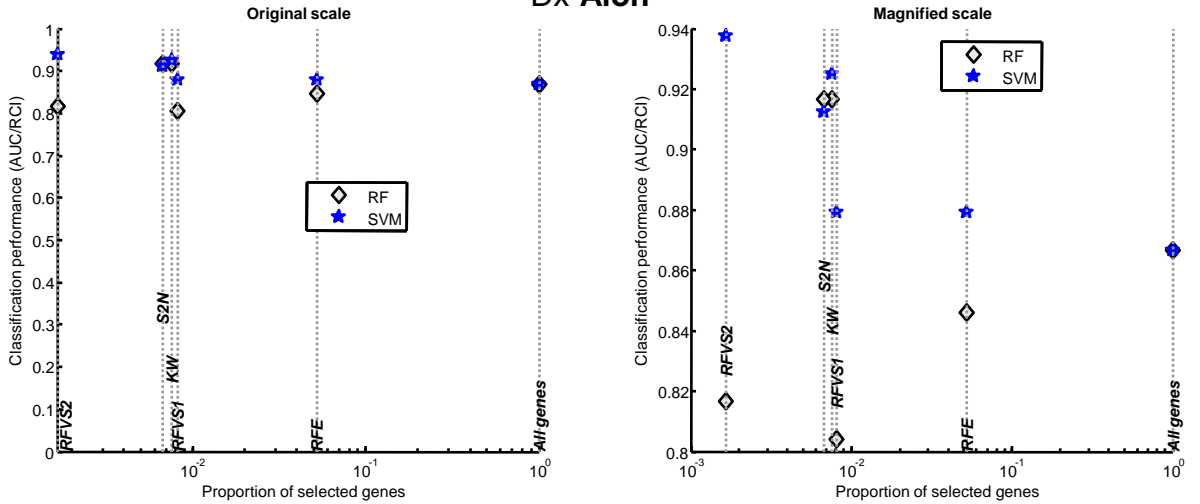

# Dx-Alizadeh

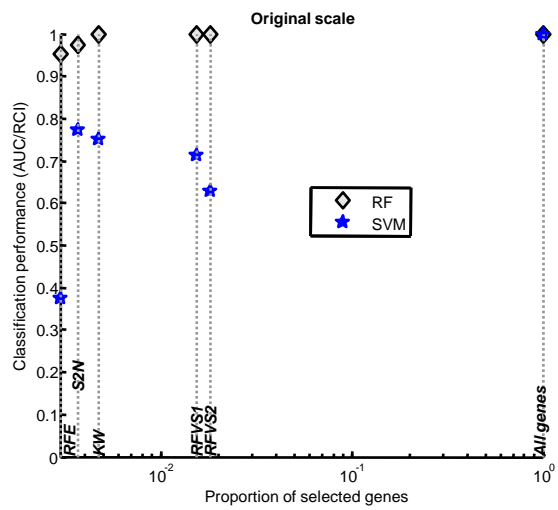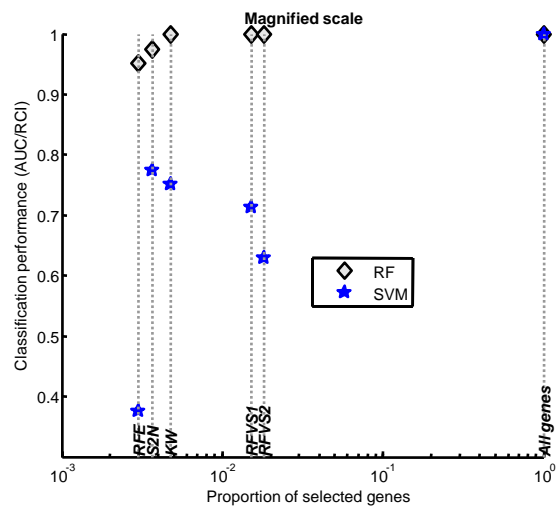

Supplement: 1471-2105-9-319-S1.pdf [file 1471-2105-9-319-S1.pdf]
