# Supplementary material for: A comprehensive comparison of random forests and support vector machines for microarray-based cancer classification
Source: PubMed Central journal article supplement (PMC2492881; doi:10.1186/1471-2105-9-319), 2008-07-22
Supplement: 1471-2105-9-319-S2.pdf [file 1471-2105-9-319-S2.pdf]

## Additional File 2:

### Simulation experiment demonstrating sensitivity of random forests to input parameters.

Using a uniform random number generator with range  $[-1, 1]$ , a dataset with 100 variables and 1,000 samples was generated. The response variable was constructed as the sign of sum of variables #1-#10 (i.e., it is a linear decision function). The dataset was randomly split into a non-overlapping training and testing set with 500 samples each.

Linear SVM classifier was applied to this dataset with penalty parameter  $C = \{0.1, 1, 10, 100, 1000, 10000\}$ . RF classifier was applied with parameters  $mtry = \{1, 2, 5, 10, 20\}$  and  $ntree = \{1, 10, 100, 1000, 10000\}$ . The classification performance measured by AUC is provided in the tables below.

#### Performance of SVMs

| $C$   |       |       |       |       |       |
|-------|-------|-------|-------|-------|-------|
| 0.1   | 1     | 10    | 100   | 1000  | 10000 |
| 0.970 | 0.973 | 0.970 | 0.970 | 0.970 | 0.970 |

#### Performance of RFs

| $mtry$ | $ntree$ |       |       |       |       |
|--------|---------|-------|-------|-------|-------|
|        | 1       | 10    | 100   | 1000  | 10000 |
| 1      | 0.502   | 0.628 | 0.722 | 0.861 | 0.880 |
| 2      | 0.572   | 0.678 | 0.815 | 0.905 | 0.913 |
| 5      | 0.548   | 0.725 | 0.879 | 0.936 | 0.947 |
| 10     | 0.552   | 0.789 | 0.909 | 0.957 | 0.956 |
| 20     | 0.631   | 0.775 | 0.924 | 0.949 | 0.951 |

As can be seen, for some parameters of RFs, the classification performance can be close to flipping a fair coin (0.5 AUC). On the other hand, SVMs are robust to the choice of penalty parameter  $C$ .
